# Supplementary material for: Titanium Dioxide Nanoparticles Altered the lncRNA Expression Profile in Human Lung Cells
Source: MDPI journal article supplement (doi:10.3390/ijerph20021059), 2023-01-06
Supplement: s1 [file s1]

## Supplementary Information

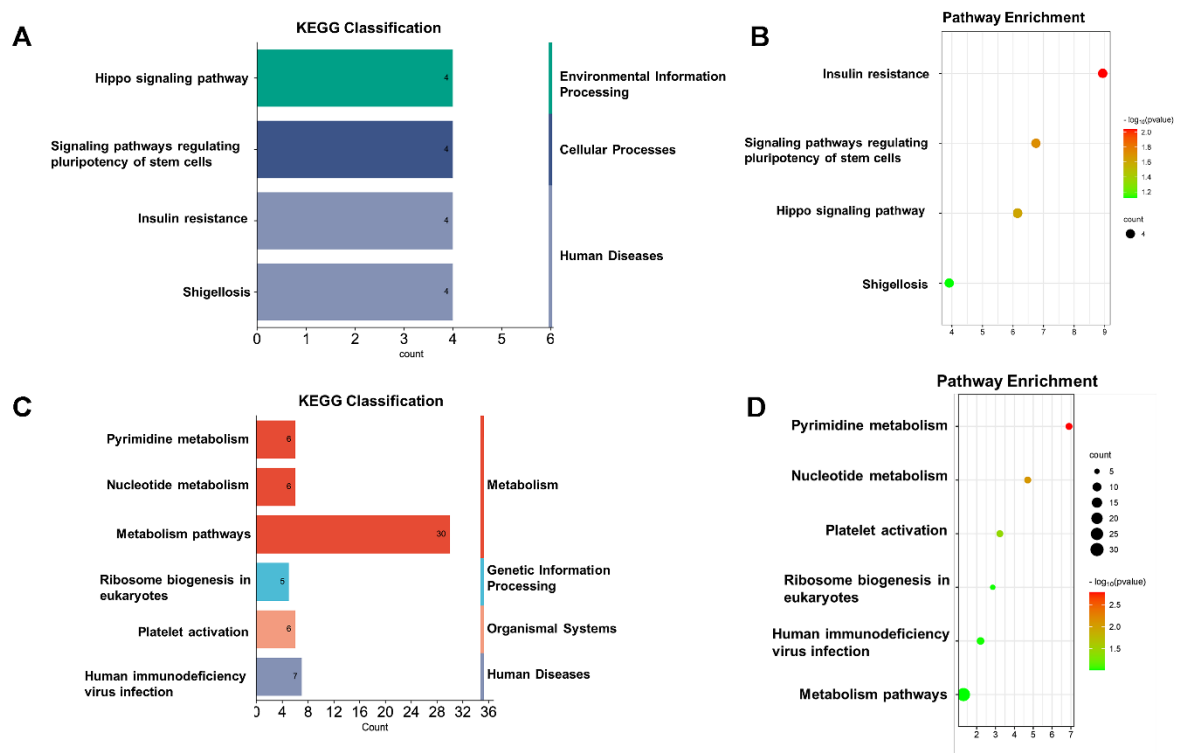

**Figure S1.** KEGG analysis of differentially expressed lncRNAs target genes. (A) The number of upregulated lncRNAs' target genes KEGG classifications was shown; (B) The results of KEGG pathway enrichment analysis of upregulated lncRNAs' target genes were shown in scatter plots; (C) The number of downregulated lncRNAs' target genes KEGG classifications was shown; (D) The results of KEGG pathway enrichment analysis of downregulated lncRNAs' target genes were shown in scatter plots.
